# Supplementary material for: Tetramethylpyrazine: an electrolyte additive for high capacity and energy efficiency lithium–oxygen batteries
Source: Royal Society of Chemistry journal article supplement (doi:10.1039/d1ra03220h), 2021-01-01
Supplement: d1ra03220h1.pdf [file d1ra03220h1.pdf]

**Tetramethylpyrazine: An Electrolyte Additive for High Capacity and Energy**

**Efficiency Lithium Oxygen batteries**

Mengyuan Song, <sup>a</sup> Chunguang Chen, <sup>\*a, b</sup> Tao Huang, <sup>c</sup> Aishui Yu <sup>\*a</sup>

---

<sup>a</sup> Department of Chemistry, Shanghai Key Laboratory of Molecular Catalysis and Innovative Materials, Fudan University, Shanghai, 200438, China

<sup>b</sup> Department of Chemistry, College of Science, University of Shanghai for Science and Technology, Shanghai 200093, China

<sup>c</sup> Laboratory of Advanced Materials, Fudan University, Shanghai, 200438, China

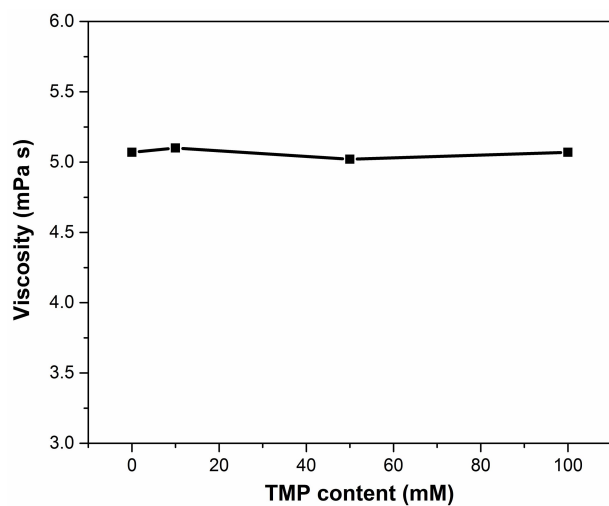

**Fig. S1** Viscosity in 0.5 M LiTFSI/TEGDME with various amounts of TMP content.

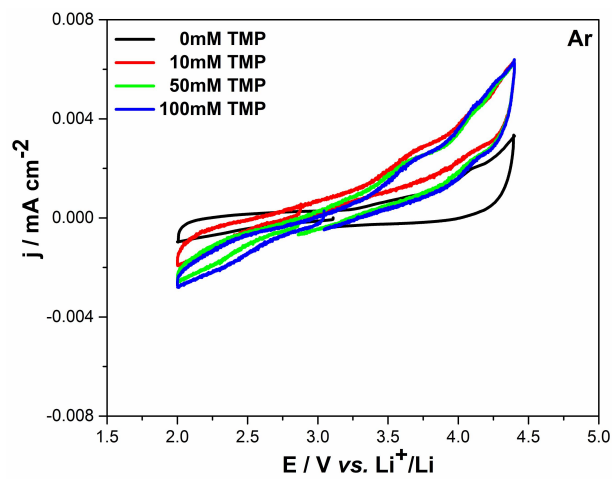

**Fig. S2** CV curves under Ar atmosphere at a scan rate of  $50 \text{ mV s}^{-1}$  in three-electrode system.

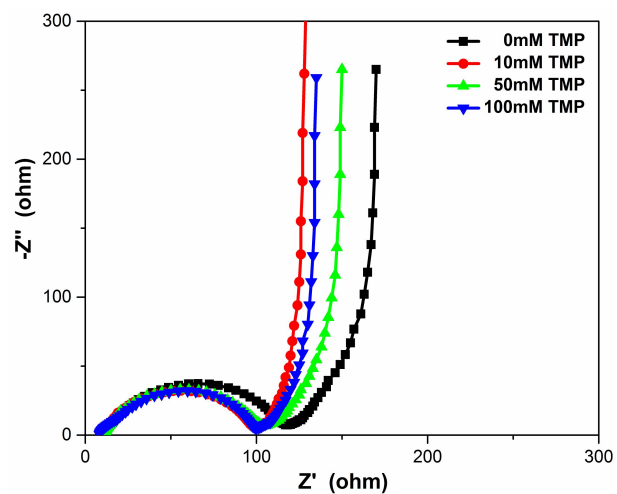

**Fig. S3** EIS of cells with different TMP content at an open circuit potential in an oxygen atmosphere.

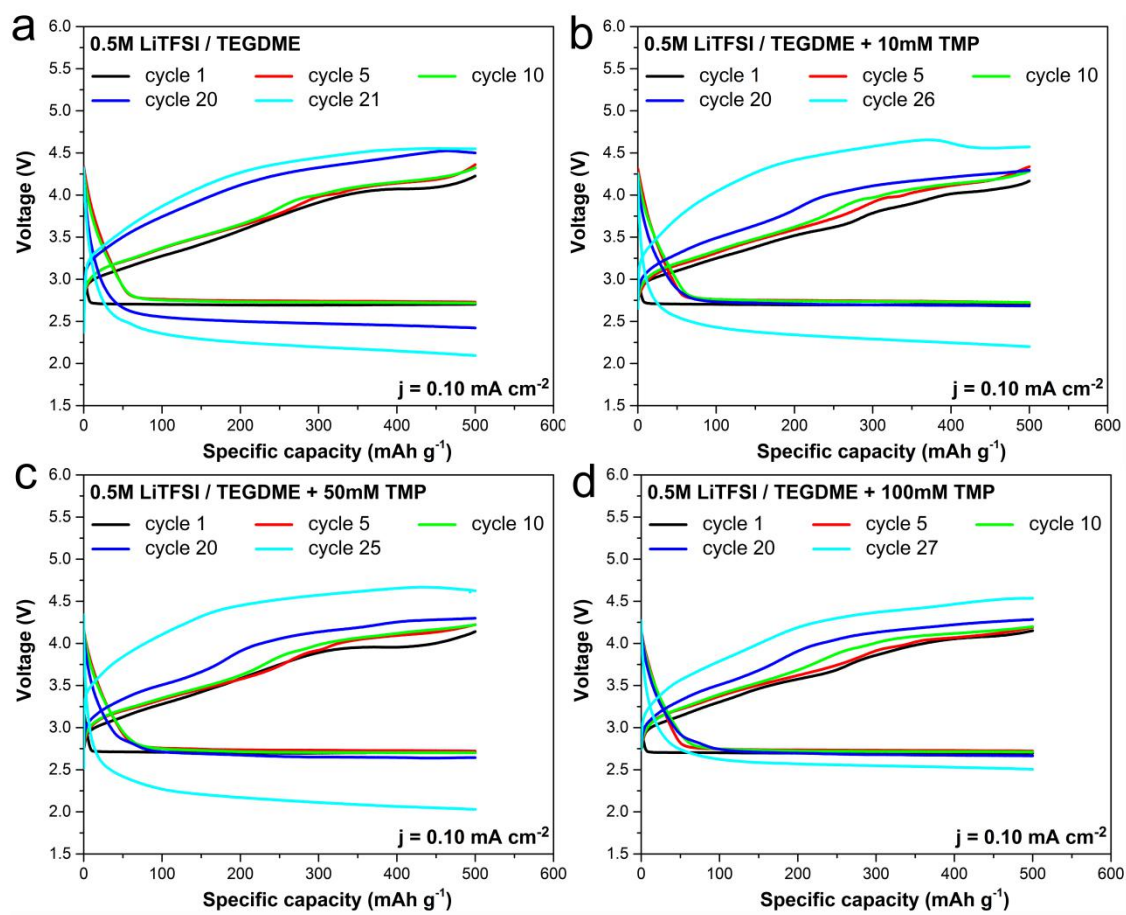

**Fig. S4** Cycling performance of the LOB with/without TMP with a capacity limitation of  $500 \text{ mAh g}^{-1}$  at a current density of  $0.10 \text{ mA cm}^{-2}$ .
